# Supplementary material for: Molecular Cloning and Characterization of First Organic Matrix Protein from Sclerites of Red Coral, Corallium rubrum
Source: PubMed Central journal article supplement — J Biol Chem. 2012 Apr 13;287(23):19367–76. doi: 10.1074/jbc.M112.352005 (PMC3365975; doi:10.1074/jbc.m112.352005), 2012-04-13
Supplement: supp_M112.352005_jbc.M112.352005-1.pdf [file supp_M112.352005_jbc.M112.352005-1.pdf]

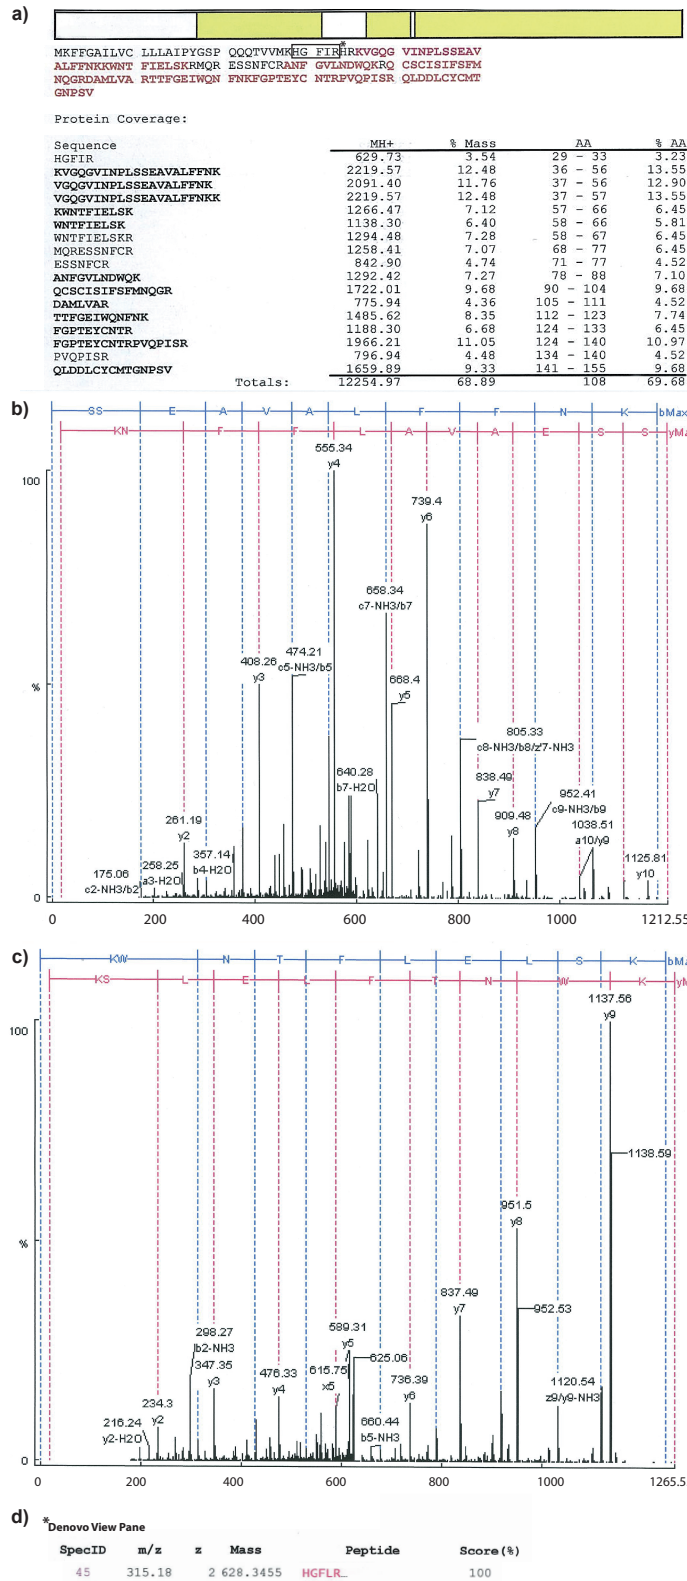

**SUPPLEMENTAL FIGURE 1.** Recovery confirmation of amino acids sequence of scleritin with the signal peptide and *de novo* sequencing spectra of the two peptides from scleritin sequence obtained by capillary-LC/ESI/MS/MS and used to design primers. (a) Recovery confirmation of the amino acids sequence of the scleritin with the signal peptide, (b) Spectrum of the PLSSEAVLFFNK peptide ( $m/z$  711.89), (c) Spectrum of the KWNTFIELSK peptide ( $m/z$  633.35). The *de novo sequencing* was performed by considering precise mass differences between adjacent b (red) and y (blue) ion series, (d) *de novo* result of the HGFIR peptide ( $m/z$  628.34).
